# Supplementary material for: Boronic acid-functionalized Fe3O4 nanoparticles for activity-preserved enrichment of low-abundance bacteria from real samples
Source: Royal Society of Chemistry journal article supplement (doi:10.1039/d4ra08826c), 2025-01-01
Supplement: d4ra08826c1.pdf [file d4ra08826c1.pdf]

## ***Supplementary Information***

Boronic acid-functionalized  $Fe_3O_4$  nanoparticles for activity-preserved enrichment of low-abundance bacteria from real samples

Jingwen Chen,<sup>a,b</sup> Shaobo Li,<sup>a,b</sup> Bin Deng,<sup>a,b</sup> Hongyuan Wang,<sup>a,b</sup> Wenkui Sun,<sup>c</sup> Li

Li,<sup>b,\*</sup> Zongchun Bai,<sup>b,\*</sup> and Jing Liu<sup>a,\*</sup>

<sup>a</sup> *School of Pharmacy, China Pharmaceutical University, Nanjing, China*

<sup>b</sup> *Institute of Agricultural Facilities and Equipment, Jiangsu Academy of Agricultural Sciences, Key Laboratory of Protected Agriculture Engineering in the Middle and Lower Reaches of Yangtze River, Ministry of Agriculture and Rural Affairs, Nanjing, China*

\*Corresponding Author:

E-mail: [muzishuiqudou@163.com](mailto:muzishuiqudou@163.com) (L. Li)

Address: Jiangsu Academy of Agricultural Sciences, 50 Zhongling Street, Nanjing 210014, China

E-mail: [vipmaple@126.com](mailto:vipmaple@126.com) (Z. Bai)

Address: Jiangsu Academy of Agricultural Sciences, 50 Zhongling Street, Nanjing 210014, China

E-mail: [liujing@cpu.edu.cn](mailto:liujing@cpu.edu.cn) (J. Liu)

Address: School of Pharmacy, China Pharmaceutical University, No. 24 Tongjiaxiang Road, Nanjing, 210009, China.

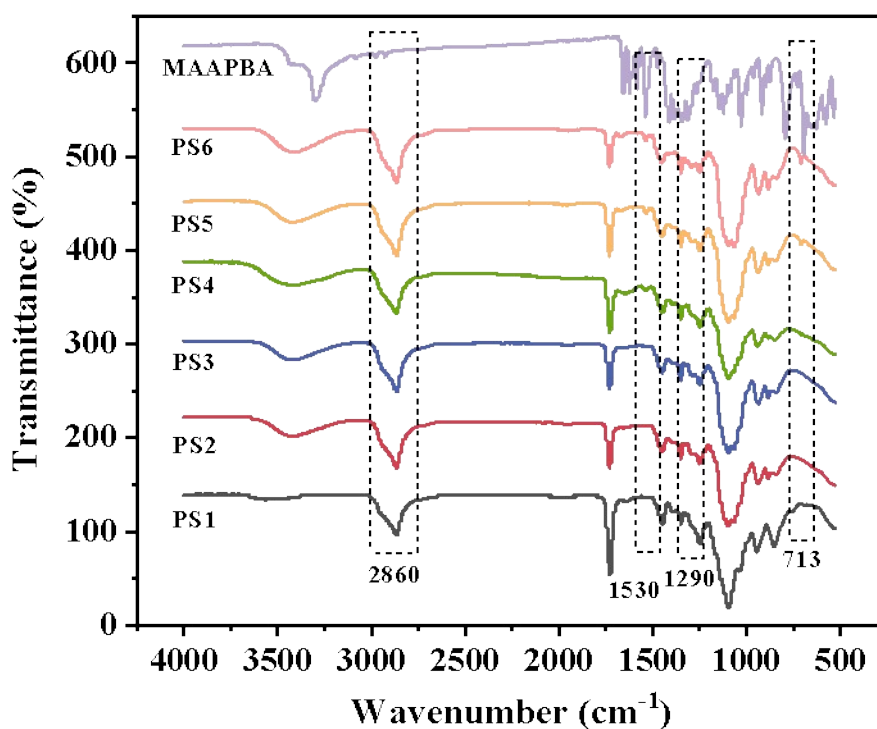

**Supplementary Figure 1.** FTIR spectra of *PS1*, *PS2*, *PS3*, *PS4*, *PS5*, *PS6*, and 3-the functional monomer methacrylamidophenylboronic acid (MAAPBA).

The mass ratios of MAAPBA to PEGDA were 1:200, 1:100, 1:50, 1:10, and 1:5, and the copolymers without *NPs* were named herein as *PS2*, *PS3*, *PS4*, *PS5*, and *PS6*, respectively. The obtained poly(PEGDA) without *NPs* was named *PS1* herein. There were no obvious differences in the FTIR spectra of *PS1* and *PS2* when compared with that of *PS1*. With increasing the amount of MAAPBA, two characteristic peaks associated with MAAPBA at approximately 1530  $\text{cm}^{-1}$  and 713  $\text{cm}^{-1}$  appeared in the spectra of *PS4*, *PS5*, and *PS6*. These peaks were attributed to the flexural vibrations of N-H groups and the benzene ring vibrations. These results proved that MAAPBA could copolymerize with PEDGA to form the capping copolymers of  $\text{Fe}_3\text{O}_4@\text{SiO}_2@\text{TPM}$  *NPs*.
